# Supplementary material for: Dangerous Relations in the Arctic Marine Food Web: Interactions between Toxin Producing Pseudo-nitzschia Diatoms and Calanus Copepodites
Source: Mar Drugs. 2015 Jun 16;13(6):3809–35. doi: 10.3390/md13063809 (PMC4483658; doi:10.3390/md13063809)
Supplement: Supplementary File 1 [file marinedrugs-13-03809-s001.pdf]

## Supplementary Information

**Table S1.** Nutrient concentrations at start and end of the grazing experiments. Number of replicates was  $n = 3$  except for the nitrate control start with  $n = 2$ . Values are given as mean  $\pm$  SD. Results are given as \* = significant difference from control start  $P < 0.05$  and \*\* = significant difference from the control end.

| Time (h) | Treatment                                          | SiOH <sub>4</sub> ( $\mu\text{mol L}^{-1}$ ) | PO <sub>4</sub> <sup>3-</sup> ( $\mu\text{mol L}^{-1}$ ) | NH <sub>4</sub> <sup>+</sup> ( $\mu\text{mol L}^{-1}$ ) | NO <sub>3</sub> <sup>-</sup> ( $\mu\text{mol L}^{-1}$ ) | pH              |
|----------|----------------------------------------------------|----------------------------------------------|----------------------------------------------------------|---------------------------------------------------------|---------------------------------------------------------|-----------------|
| 0        | <i>P. seriata</i>                                  | 6.7 $\pm$ 0.6                                | 7.0 $\pm$ 0.2                                            | 38.8 $\pm$ 1.7                                          | 164.8 $\pm$ 12.5                                        | 8.08 $\pm$ 0.00 |
| 0        | <i>P. obtusa</i>                                   | 4.3 $\pm$ 1.3                                | 8.2 $\pm$ 0.9                                            | 35.5 $\pm$ 4.4                                          | 207.7 $\pm$ 32.8                                        | 8.08 $\pm$ 0.01 |
| 0        | <i>P. seriata</i> + <i>P. obtusa</i>               | 5.6 $\pm$ 0.1                                | 8.1 $\pm$ 0.2                                            | 39.3 $\pm$ 1.1                                          | 203.7 $\pm$ 4.1                                         | 8.09 $\pm$ 0.00 |
| 39       | <i>P. seriata</i>                                  | 3.6 $\pm$ 0.3 *                              | 7.4 $\pm$ 0.1 *                                          | 39.9 $\pm$ 1.0                                          | 177.7 $\pm$ 1.0                                         | 8.11 $\pm$ 0.00 |
| 39       | <i>P. obtusa</i>                                   | 1.4 $\pm$ 0.3 *                              | 8.6 $\pm$ 0.0                                            | 36.9 $\pm$ 0.7                                          | 229.1 $\pm$ 1.5                                         | 8.18 $\pm$ 0.00 |
| 39       | Mix of <i>P. s</i> and <i>P. o</i>                 | 2.4 $\pm$ 0.3 *                              | 7.7 $\pm$ 0.2                                            | 37.9 $\pm$ 0.2                                          | 194.3 $\pm$ 4.2                                         | 8.16 $\pm$ 0.01 |
| 39       | <i>P. seriata</i> + copepodites                    | 4.6 $\pm$ 0.3                                | 7.7 $\pm$ 0.3 *                                          | 41.9 $\pm$ 1.0 *                                        | 176.4 $\pm$ 3.8                                         | 8.10 $\pm$ 0.01 |
| 39       | <i>P. obtusa</i> + copepodites                     | 2.4 $\pm$ 0.5 **                             | 8.5 $\pm$ 0.2                                            | 39.7 $\pm$ 0.6 **                                       | 225.2 $\pm$ 3.7                                         | 8.17 $\pm$ 0.01 |
| 39       | Mix of <i>P. s.</i> and <i>P. o.</i> + copepodites | 3.6 $\pm$ 1.1                                | 8.6 $\pm$ 0.7                                            | 40.7 $\pm$ 0.2                                          | 201.8 $\pm$ 4.9                                         | 8.14            |

**Table S2.** Domoic acid (DA) cell quota of *Pseudo-nitzschia seriata* (pg DA cell<sup>-1</sup>) in induction experiments on days 0–8 (mean  $\pm$  SD) in control, flask A with cells and copepodites, and flask B with cells separated from copepodites with a membrane.  $n$  = number of copepodites.

| Time (day) | Control (pg DA Cell <sup>-1</sup> ) | Flask A $n = 12$ (pg DA Cell <sup>-1</sup> ) | Flask B $n = 12$ (pg DA Cell <sup>-1</sup> ) | Flask A $n = 20$ (pg DA Cell <sup>-1</sup> ) | Flask B $n = 20$ (pg DA Cell <sup>-1</sup> ) |
|------------|-------------------------------------|----------------------------------------------|----------------------------------------------|----------------------------------------------|----------------------------------------------|
| 0          | 0.4 $\pm$ 0.1                       |                                              |                                              |                                              |                                              |
| 2          | 0.3 $\pm$ 0.1                       | 4.3 $\pm$ 0.6                                | 0.6 $\pm$ 0.2                                | 3.3 $\pm$ 0.9                                | 0.7 $\pm$ 3.0                                |
| 5          | 0.3 $\pm$ 0.1                       | 6.3 $\pm$ 1.0                                | 5.0 $\pm$ 1.8                                | 5.5 $\pm$ 1.5                                | 6.5 $\pm$ 1.8                                |
| 8          | 0.4 $\pm$ 0.0                       | 13.3 $\pm$ 4.9                               | 9.2 $\pm$ 2.8                                | 9.5 $\pm$ 3.0                                | 12.4 $\pm$ 1.9                               |

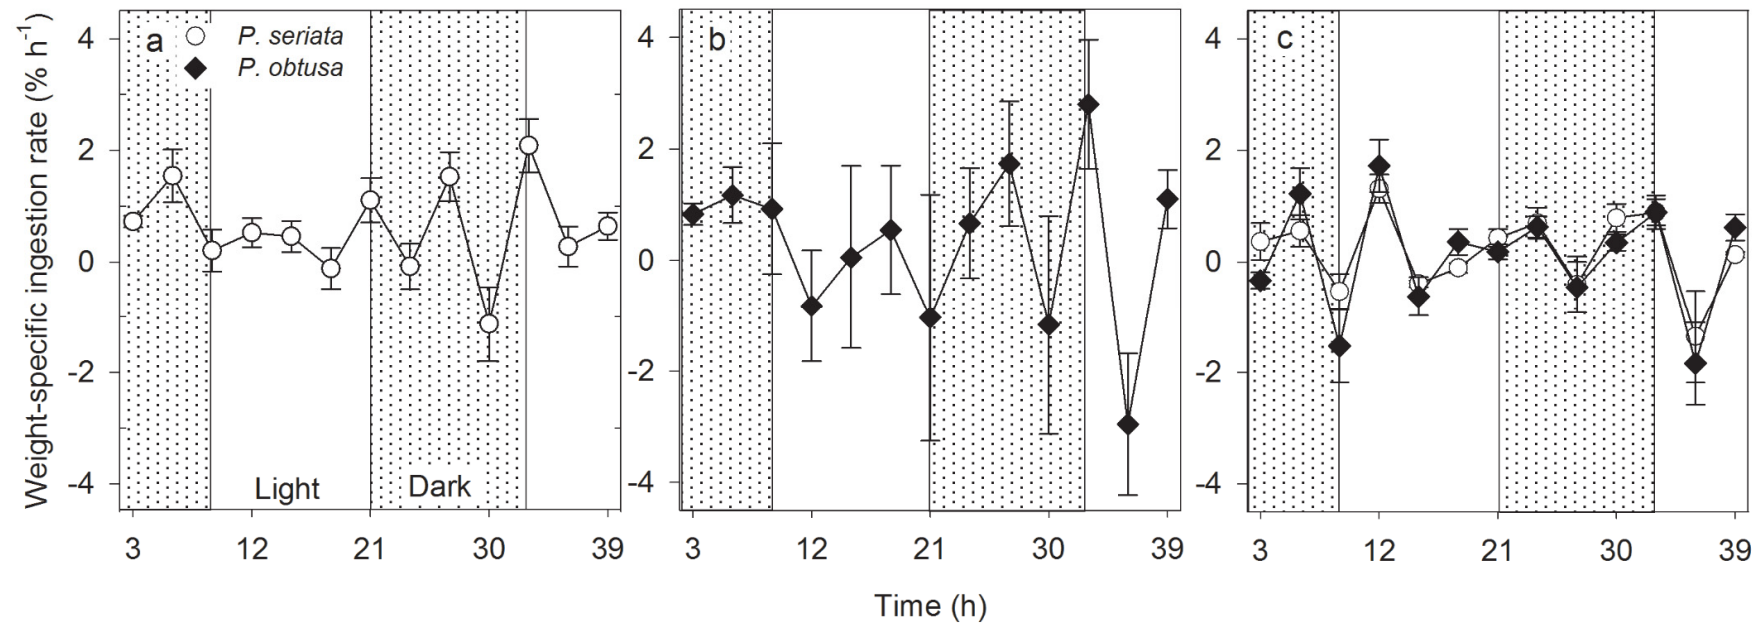

**Figure S1.** Grazing experiment. Weight-specific ingestion rates (percentage per hour, mean  $\pm$  SD) for grazing on (a) *Pseudo-nitzschia seriata* (b) *P. obtusa* (c) and a mix of both species, during a 39 h-period. A 12:12 light:dark period was used, and the periods are marked as light or dark time periods.
